# Supplementary material
Source: PubMed Central journal article supplement (PMC9394382)
Supplement: cd-21-0692_supplementary_figure_s1_supps1.pdf [file cd-21-0692_supplementary_figure_s1_supps1.pdf]

# Figure S1

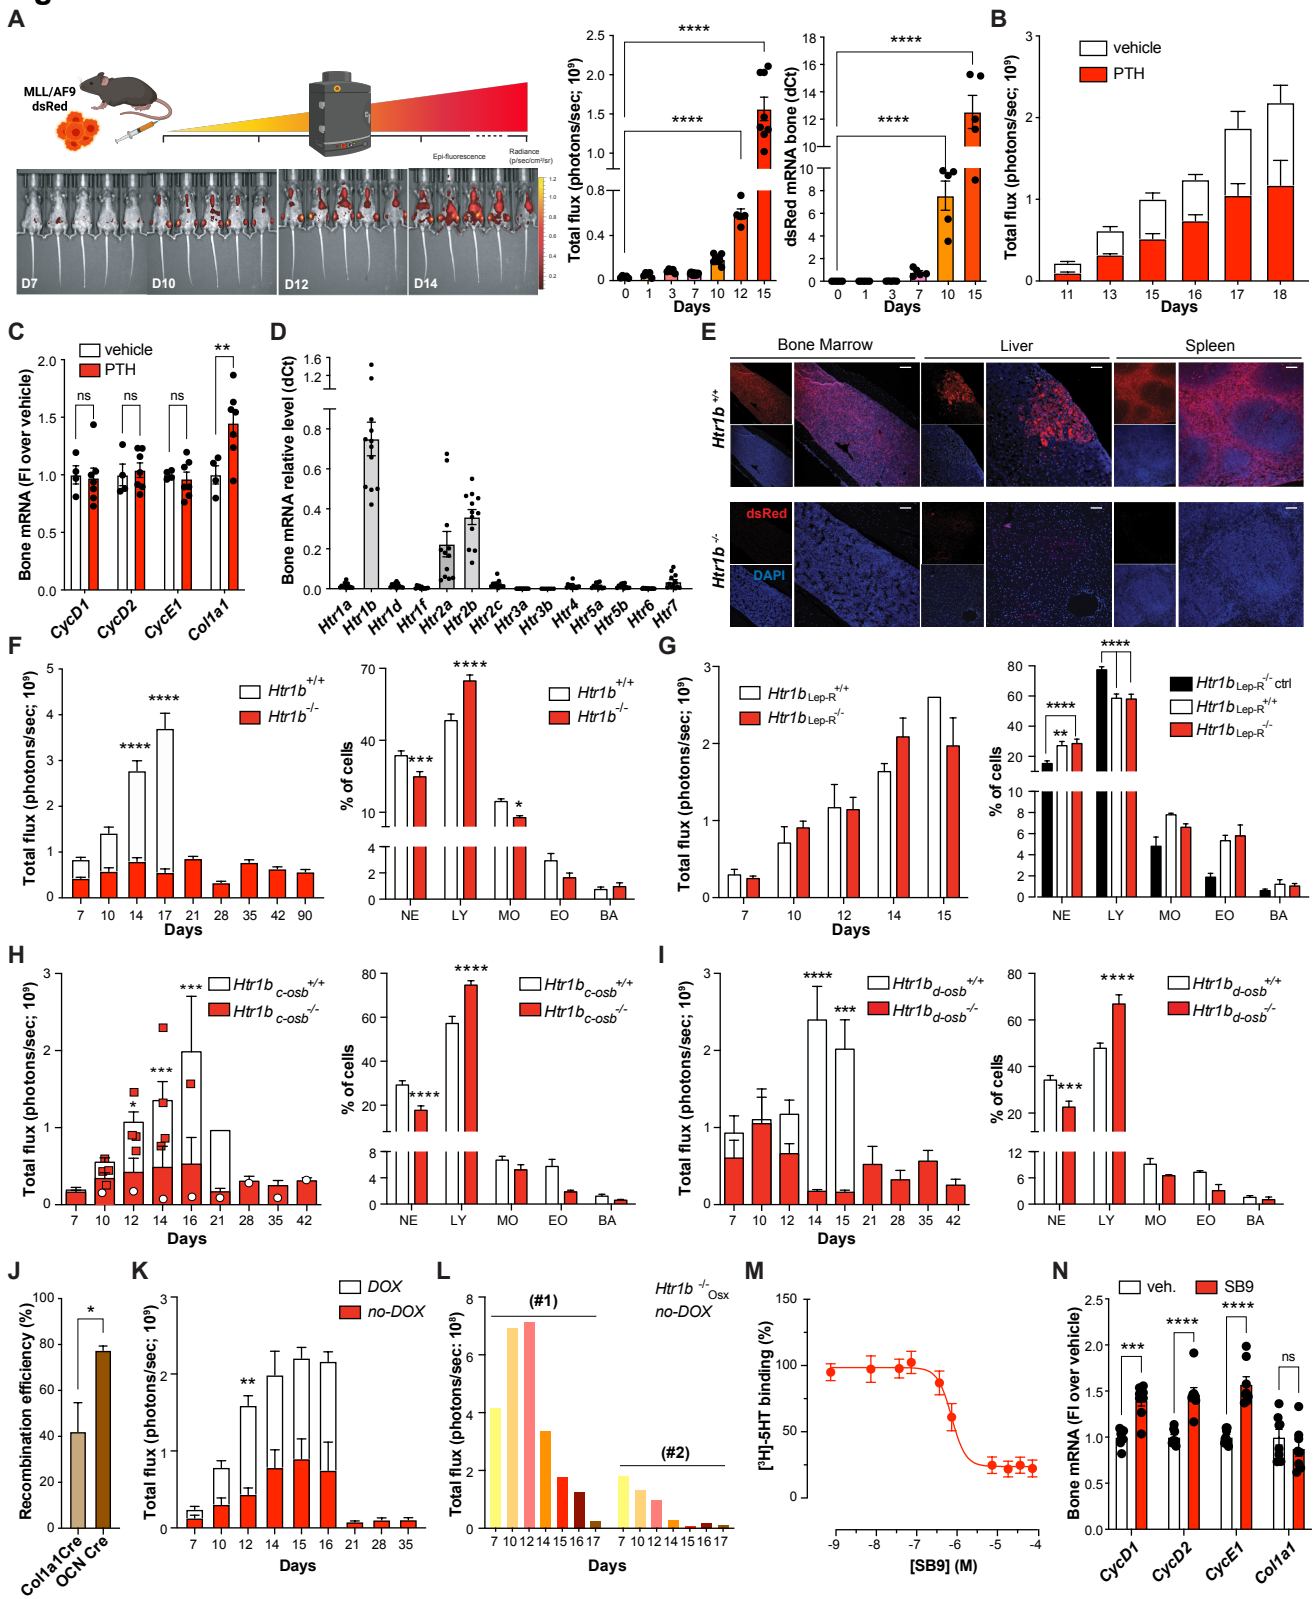

**Supplementary Figure S1. Expression of *Htr1b* in osteoblasts is necessary for leukemia progression. Related to Figure 1.** (A) Representative images of *in vivo* leukemia progression in MLL/AF9-dsRed injected wild-type (WT) mice at the indicated days. Histograms: ds-Red emitted fluorescence (n=5-14 mice/day) and mRNA levels in bone (femur, n=5 mice/day); one-way ANOVA. (B) *In vivo* leukemia progression (fluorescence counts) in WT MLL/AF9 mice treated with vehicle (n=4) or PTH (n=7). (C) mRNA cyclins (*Cyc*) and collagen 1 (*Colla1*) levels in bone (femur) of mice in (B). (D) mRNA relative levels of the 14-known serotonin receptors in primary mouse osteoblasts (n=12 femur samples). (E) Representative images of *Htr1b*<sup>-/-</sup> vs *Htr1b*<sup>+/+</sup> littermates injected with MLL/AF9 dsRed cells; nuclei stained with 4,6-diamidino-2-phenylindole staining (DAPI). Scale 100μm. (F-I): Left panels: *In vivo* quantification of leukemia progression (dsRed fluorescence); right panels: complete blood counts (CBC) at harvest in: (F) *Htr1b*<sup>-/-</sup> (n=29 flux; n=8 CBC) vs. *Htr1b*<sup>+/+</sup> (n=13 flux; n=5 CBC) mice; (G) mice lacking *Htr1b* expression in mesenchymal/stromal progenitor cells (*Htr1b*<sub>Lep-R</sub><sup>-/-</sup>, n=8 vs. *Htr1b*<sub>Lep-R</sub><sup>+/+</sup>, n=4); (H) in committed osteoblast progenitors (*Htr1b*<sub>c-osb</sub><sup>-/-</sup>, n=7 vs. *Htr1b*<sub>c-osb</sub><sup>+/+</sup>, n=11 -the 4 *Htr1b*<sub>c-osb</sub><sup>-/-</sup> mice dead are independently depicted with red squares and the only *Htr1b*<sub>c-osb</sub><sup>+/+</sup> alive is shown with a white circle-; or in (I) differentiated osteoblasts (*Htr1b*<sub>d-osb</sub><sup>-/-</sup>, n=5 vs. *Htr1b*<sub>d-osb</sub><sup>+/+</sup>, n=7 flux and n=3 CBCs). (J) Recombination efficiency percentage in CollaCre (n=2) versus OCN Cre (n=3) lines for the *Htr1b* fl/fl locus; unpaired t-test. (K) *In vivo* quantification of leukemia progression in mice kept on doxycycline (DOX) diet (*Htr1b*<sub>Osx</sub><sup>+/+</sup>; n=6) or with DOX- removed 24h after MLL/AF9 injection (no-DOX; *Htr1b*<sub>Osx</sub><sup>-/-</sup>; n=9). (L) *In vivo* quantification of leukemia progression on the indicated days for the two survivor mice (#1 and #2) in the no-DOX group. (M) Radioligand competitive-binding assay on *Htr1b*-overexpressing-HEK293T membranes with [<sup>3</sup>H]-5-HT (25nM, 41.3 Ci/mmol) competed out with SB9 at the indicated concentrations, logEC<sub>50</sub>: 1μM (see Table 1). (N) mRNA cyclins (*Cyc*) and collagen 1 (*Colla1*) levels in bone (femur) of WT mice injected with MLL/AF9-dsRed cells and treated with either vehicle (n=8) or SB9 (n=8). Osb, osteoblast; NE, neutrophils; LY, lymphocytes; MO, monocytes; EO, eosinophils and BA, basophils. All data are represented as mean ± SEM. Statistical analysis done with two-way ANOVA unless otherwise stated.
