# Supplementary material
Source: PubMed Central journal article supplement (PMC9394382)
Supplement: cd-21-0692_supplementary_figure_s4_supps4.pdf [file cd-21-0692_supplementary_figure_s4_supps4.pdf]

# Figure S4

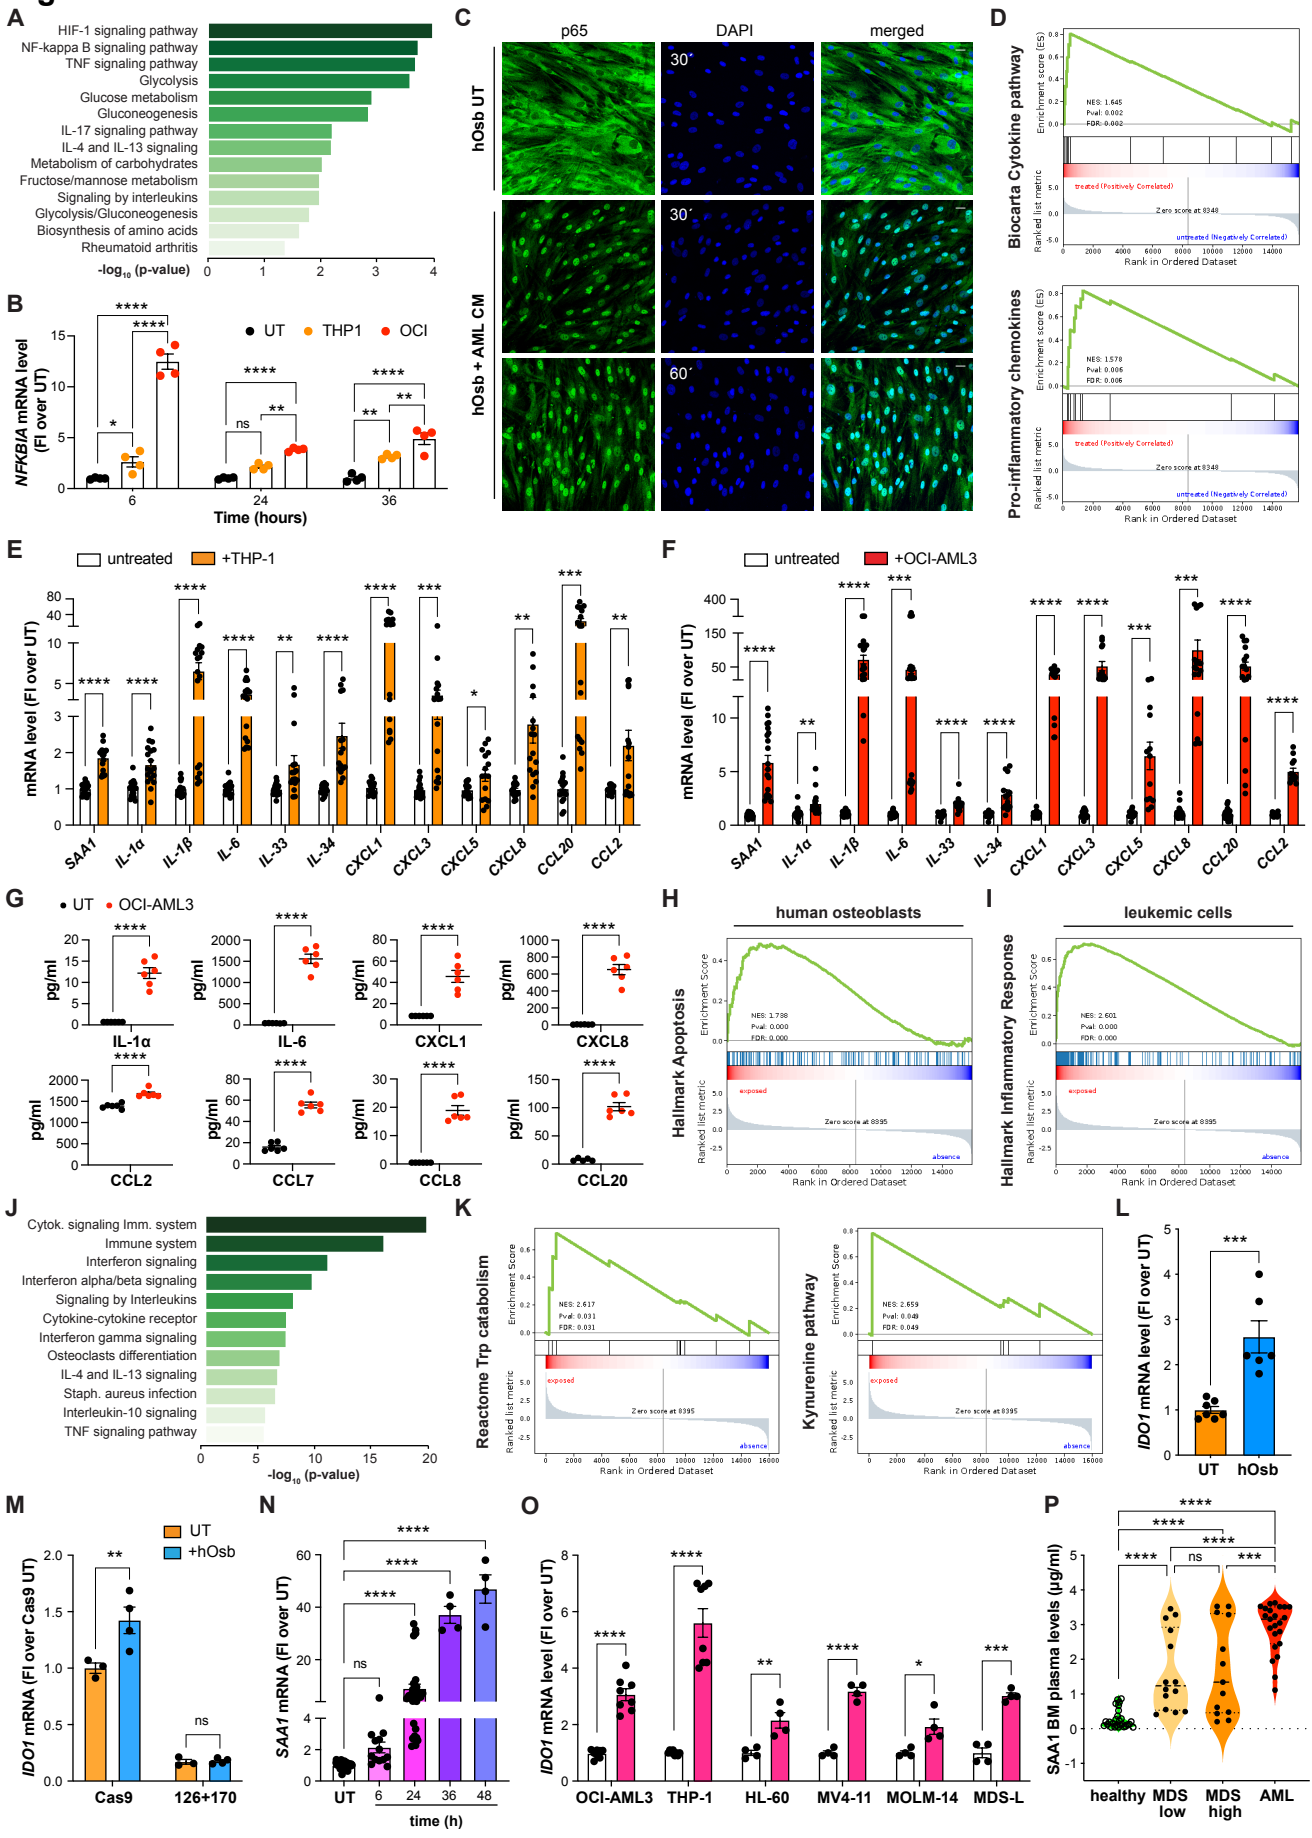

**Supplementary Figure S4. AML cells induce a self-reinforcing niche that upregulates *IDO1* expression by eliciting SAA in osteoblasts. Related to Figure 4.** (A) RNAseq data KEGG (Kyoto Encyclopedia of Genes and Genomes) pathway enrichment analysis of upregulated genes in primary human osteoblasts exposed to the AML cell-line THP-1. (B) *NFKB1A* mRNA relative level (fold induction -FI- over untreated -UT-) of primary human osteoblasts exposed to the THP-1 or OCI-AML3 cell lines for the indicated time points (n=4); two-way ANOVA. (C) Representative immunofluorescence images of primary human osteoblasts differentiated for 10 days and exposed to conditioned media (CM) for 30-60 min; p65 (green) and DAPI (nuclear stain, blue). Scale 66µm. (D) Gene Set Enrichment analysis (GSEA) plot for cytokines and pro-inflammatory chemokines. (E-F) mRNA relative level (FI over UT) of the indicated molecules in primary osteoblasts co-cultured with the human THP-1 (E) or the OCI-AML3 (F) AML cell-lines for 24h (n=12 replicates from 4 healthy human samples). (G) Protein level of the indicated molecules in supernatants from co-cultures (n=6). (H) GSEA analysis for apoptosis hallmark genes in human osteoblasts exposed to THP-1 cells for 24h. (I) GSEA analysis for inflammatory response hallmark genes in THP-1 cells exposed to human osteoblasts for 24h. (J) KEGG-database enrichment analysis of the upregulated genes in THP-1 AML cell-line exposed to primary human osteoblasts. (K) GSEA for tryptophan (Trp) catabolism and kynurenine pathway in the THP-1 cells exposed to primary human osteoblasts. (L) *IDO1* mRNA relative level in THP-1 cells exposed to primary human osteoblasts (n=6-7). (M) *IDO1* mRNA level in OCI-AML3 cells co-cultured 24h with primary human osteoblasts; (n=3-4), two-way ANOVA. (N) *SAA1* mRNA level in human osteoblasts exposed to OCI-AML3 cells for the indicated timepoints (UT n=48; 6h n=13; 24h n=30 and 36 and 48h n=4); one-way ANOVA. (O) *IDO1* mRNA relative level in the indicated human AML and MDS cells lines exposed o/n to SAA1; (n=4-8). (P) Kyn/Trp levels in BM plasma of healthy (n=27), MDS -stratified in low- (n=14) and high-risk (n=13) groups based on the Revised International Prognostic Scoring System (IPSS-R)- and AML (n=23) patients, one-way ANOVA. Statistical analysis done with unpaired t-test unless otherwise indicated. All data are presented as mean ± SEM.
