# Supplementary material
Source: PubMed Central journal article supplement (PMC9394382)
Supplement: cd-21-0692_supplementary_figure_s5_supps5.pdf [file cd-21-0692_supplementary_figure_s5_supps5.pdf]

**Figure S5**

**A**

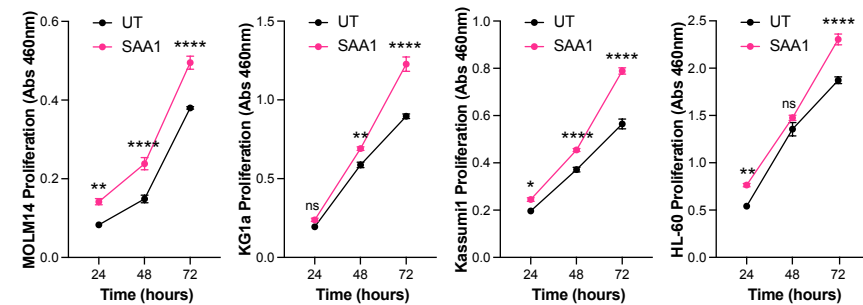

**B**

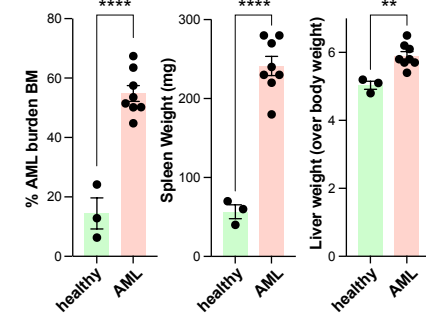

**C**

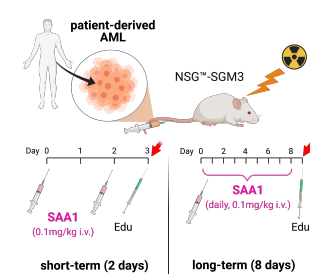

**D**

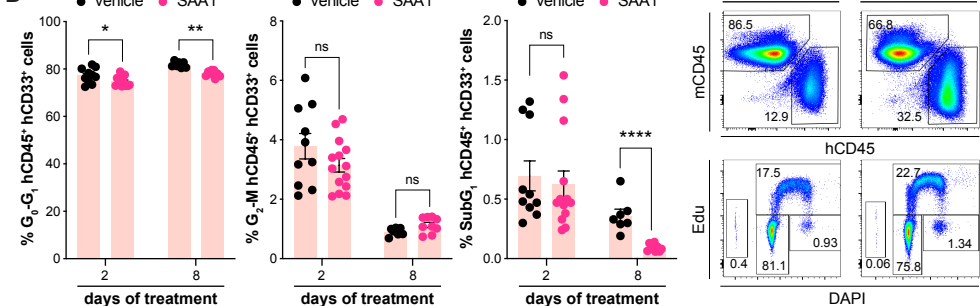

**E**

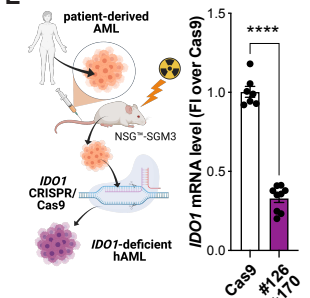

**F**

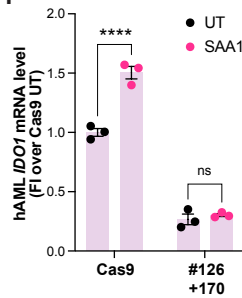

**G**

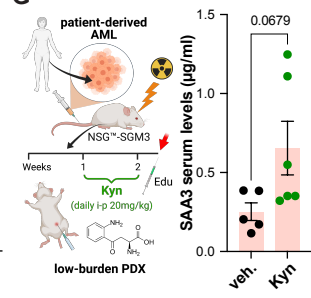

**H**

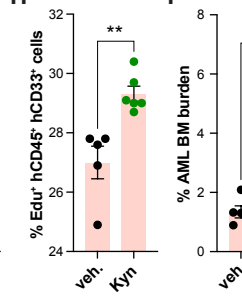

**I**

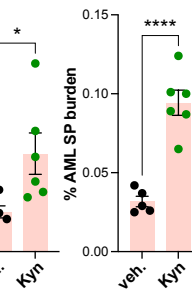

**J**

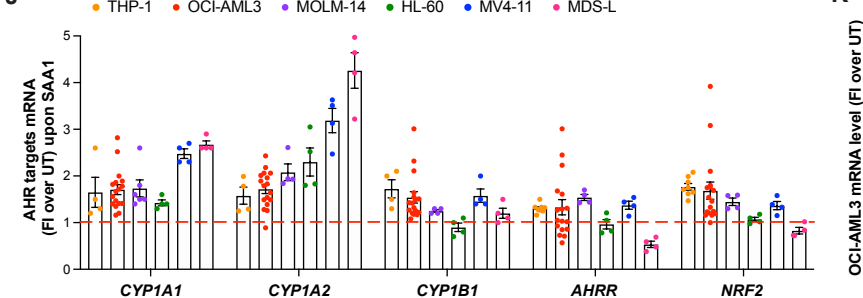

**K**

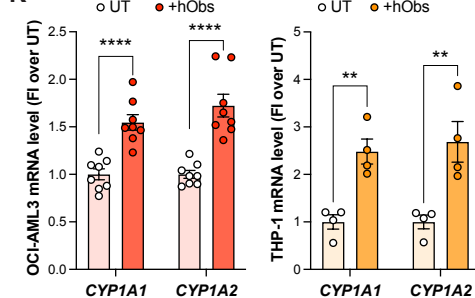

**Supplementary Figure S5. SAA1 selectively promotes AML cell proliferation. Related to Figure 5.** (A) Proliferation of human AML cell lines (MOLM-14, KG-1a, Kasumi-1 and HL-60) exposed to SAA1 (1 $\mu$ g/ml) for 24, 48 or 72h, (n=8 for all cell lines); two-way ANOVA. (B) AML burden, spleen weight and liver weight (over body weight) in the PDX mice 4 weeks after transplant with either CD34<sup>+</sup> healthy (n=3 mice) or patient-derived AML (n=8 mice) cells. (C) Diagram showing the short term (2-days) vs long-term (8-days) SAA1 *in vivo* treatments. (D) *In vivo* cell cycle analysis showing % of cells in G<sub>0</sub>-G<sub>1</sub>, G<sub>2</sub>-M and Sub-G<sub>1</sub> within the leukemic blasts (hCD45<sup>+</sup>CD33<sup>+</sup>) comparing 2-day vs 8-day treatments, in vehicle- (n=10 and n=7 respectively) or SAA1-treated (0.1mg/kg; n=14 and n=9 respectively); 2-way ANOVA. On the right, representative flow-plots for BM AML burden (top) and proliferation analysis (bottom) in the 8-day treatment group. (E) Schematic of CRISPR/Cas9 targeting of PDX-isolated AML human cells (left) and *IDO1* mRNA level in human AML cells nucleofected with Cas9 (n=7) or Cas9 and the combination of sgRNA#126 and sgRNA#170 (n=9). (F) *IDO1* mRNA level of cells in (E) cultured for 24h with either vehicle or SAA1 (1 $\mu$ g/ml), (n=3); two-way ANOVA. (G) Schematic of Kyn treatment in low-burden PDX (left) and SAA3 serum levels in NSGS mice injected with vehicle (n=5) or Kyn (20mg/kg; n=6) for 1 week. (H) Percentage of blasts (hCD45<sup>+</sup> hCD33<sup>+</sup>) Edu<sup>+</sup> cells of mice in (G). (I) AML burden in BM and SP of mice in (G). (J) mRNA level (expressed as FI over basal level in untreated cells: red line) of main AHR target genes in the indicated human AML and MDS cell lines exposed to SAA1 (1 $\mu$ g/ml) o/n (n=4-8 for all cell lines except OCI-AML3 n=17). (K) mRNA level (FI over UT) of AHR targets in OCI-AML3 and THP-1 cells exposed to primary human osteoblasts for 24h; 2-way ANOVA. All data expressed as mean  $\pm$  SEM. Statistical analysis was done with unpaired t-test unless otherwise stated.
